# Supplementary material for: Mesenchymal Stem Cell-derived Extracellular Vesicles Prevent Experimental Bronchopulmonary Dysplasia Complicated By Pulmonary Hypertension
Source: PubMed Central journal article supplement (PMC9397655; doi:10.1093/stcltm/szac041), 2022-06-27
Supplement: szac041_suppl_supplementary_file.pdf [file szac041_suppl_supplementary_file.pdf]

**SUPPLEMENTAL FILE**

**MESENCHYMAL STEM CELL DERIVED EXTRACELLULAR VESICLES PREVENT  
EXPERIMENTAL BRONCHOPULMONARY DYSPLASIA COMPLICATED BY PULMONARY  
HYPERTENSION**

Mayank Sharma<sup>1,2</sup>, Michael A. Bellio<sup>3</sup>, Merline Benny<sup>1,2</sup>, Shathiyah Kulandavelu<sup>1,3</sup>, Pingping Chen<sup>1,2</sup>, Janjindamai Chawisa<sup>1,2</sup>, Shanique Sterling<sup>1,2</sup>, Kevin Williams<sup>1,2</sup>, Andreas Damianos<sup>1,2</sup>, Sunil Batlahally<sup>1,2</sup>, Kaitlyn Kelly<sup>1,2</sup>, Daniela Aguilar-Caballero<sup>1,2</sup>, Ronald Zambrano<sup>1,2</sup>, Shaoyi Chen<sup>1,2</sup>, Jian Huang<sup>1,2</sup>, Shu Wu<sup>1,2</sup>, Joshua M Hare<sup>3,4</sup>, Augusto Schmidt<sup>1,2</sup>, Aisha Khan<sup>3</sup>, Karen Young<sup>1,2, 3</sup>

# Supplemental Figure 1

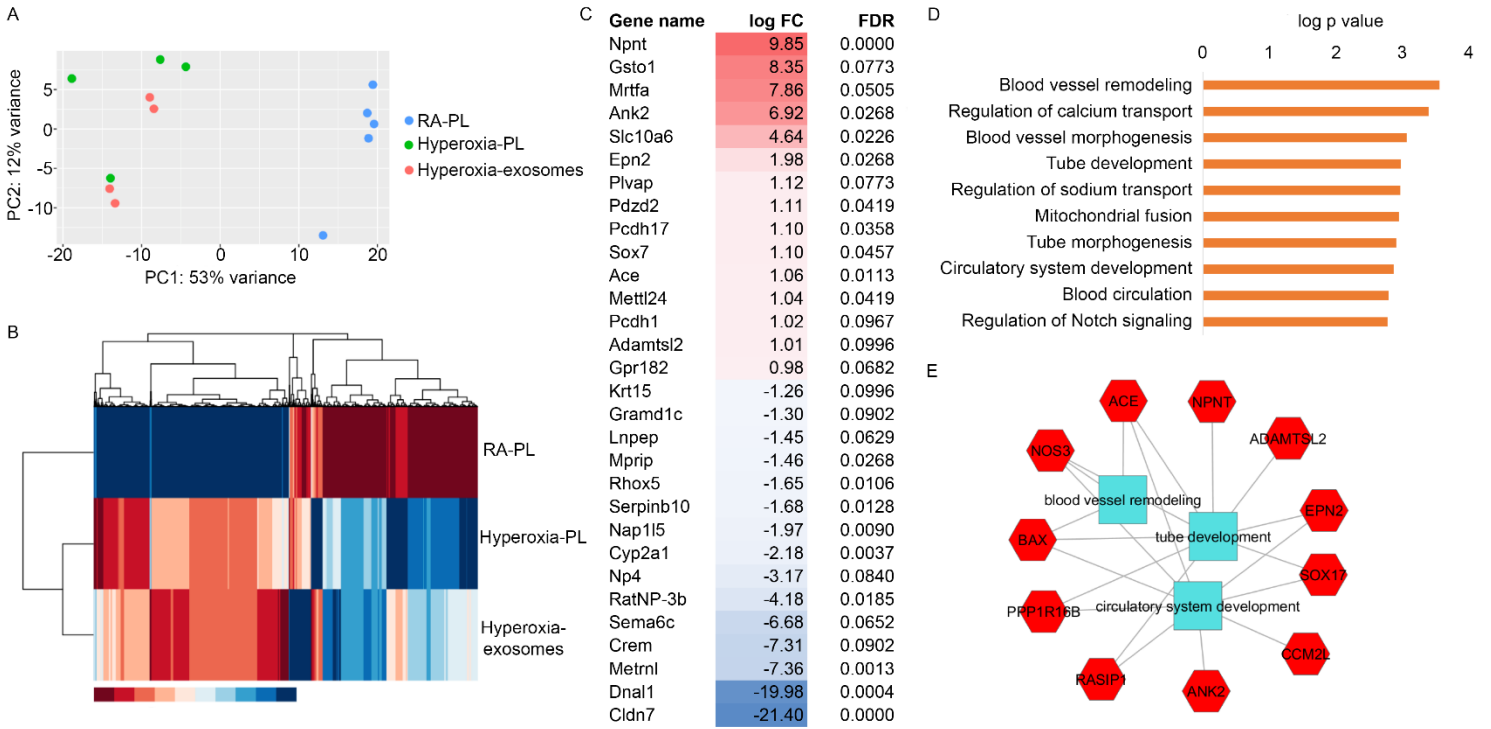

## **Supplemental Figure Legend**

### **Supplemental Fig. 1**

#### **WJ-MSC EVs modulate lung angiogenic pathways**

RNA-seq analysis of lungs from rats at P14 after exposure to room air (RA), hyperoxia placebo (PL), or hyperoxia WJ-MSC EVs show induction of pro-angiogenic pathways and processes in EV-treated rats relative to hyperoxia PL. (A) Principal component analysis shows clear separation of RA PL from hyperoxia exposed rats with partial overlap between hyperoxia PL and hyperoxia WJ-MSC EV rats. (B) Heatmap of differentially expressed transcripts show clustering of samples by treatment group. Hyperoxia PL animals showed 2741 differentially expressed transcripts compared to RA PL. Comparison of hyperoxia PL and hyperoxia WJ-MSC EV animals revealed 77 differentially expressed transcripts. (C) Top differentially expressed transcripts between hyperoxia WJ-MSC EVs and hyperoxia PL rats. (D) Gene set enrichment analysis of differentially expressed genes between hyperoxia PL and hyperoxia WJ-MSC EV rats shows induction of angiogenic processes and calcium metabolism. (E) Gene networks of induced genes associated with vascular development and remodeling.
